# Supplementary material for: Beneficial effects of pumpkin seed soft extract on lower urinary tract symptoms and quality of life in men with benign prostatic hyperplasia: a meta-analysis of two randomized, placebo-controlled trials over 12 months
Source: Springer Nature journal article supplement (doi:10.1186/s40816-022-00345-0), 2022-04-13
Supplement: MOESM1 [file 20309936]

## Supplementary Tables

### **Beneficial effects of pumpkin seed soft extract on lower urinary tract symptoms and quality of life in men with benign prostatic hyperplasia: a meta-analysis of two randomized, placebo-controlled trials over 12 months**

Winfried Vahlensieck<sup>a\*</sup>, Stefan Heim<sup>b</sup>, Brigitte Patz<sup>c</sup>, Kurtulus Sahin<sup>d</sup>

<sup>a</sup> *Specialist Clinic for Urology, Kurpark-Klinik Bad Nauheim, Germany*

<sup>b</sup> *Omega Pharma Manufacturing GmbH & Co. KG, Herrenberg, Germany*

<sup>c</sup> *Freelance Scientific Consultant, Gaeufelden, Germany*

<sup>d</sup> *ClinStat GmbH, Institute for Clinical Research and Statistics, Cologne, Germany.*

*\* Corresponding author*

Winfried Vahlensieck, Specialist Clinic for Urology, Kurpark-Klinik, Kurstr. 41-45, 61231 Bad Nauheim, Germany

E-mail address: [Winfried.Vahlensieck@t-online.de](mailto:Winfried.Vahlensieck@t-online.de).

## Supplementary Table A

Eligibility criteria, efficacy, and safety variables of the studies

| <i>Item</i>                                                   | <b>Bach study<sup>1</sup></b> | <b>GRANU study<sup>2*</sup></b> |
|---------------------------------------------------------------|-------------------------------|---------------------------------|
| <b><i>Inclusion criteria</i></b>                              |                               |                                 |
| IPSS                                                          | ≥ 13                          | ≥ 13 ≤ 19                       |
| Maximum urinary flow rate (Q <sub>max</sub> )                 | ≤ 15 mL/sec                   | ≤ 12 mL/sec                     |
| Prostate volume (PV)                                          | no limits                     | ≤ 40 mL                         |
| Post-void residual volume (PVR)                               | no limits                     | ≤ 100 mL                        |
| <b><i>Exclusion criteria</i></b>                              |                               |                                 |
| Prostate cancer                                               | ✓                             | ✓                               |
| Other urogenital diseases or infections                       | ✓                             | ✓                               |
| Insulin-dependent diabetes mellitus                           | ✓                             | HbA 1c > 6                      |
| Concurrent medical conditions with impact on micturition      | ✓                             | ✓                               |
| Concomitant medications known to cause micturition complaints | ✓                             | ✓                               |
| Previous surgical intervention on prostate                    | ✓                             | ✓                               |
| Concomitant medical treatment of BPH                          | ✓                             | ✓                               |
| Concomitant androgen / androgen antagonists                   | ✓                             | ✓                               |
| Previous surgical intervention on prostate                    | ✓                             | ✓                               |
| <b><i>Primary efficacy variable</i></b>                       |                               |                                 |
| Response rate: IPSS reduction ≥ 5 points after 12 months      | ✓                             | ✓                               |
| IPSS change from baseline after 12 months                     | ✓                             | ✓                               |
| <b><i>Secondary variables</i></b>                             |                               |                                 |
| <i>At each visit</i>                                          |                               |                                 |
| IPSS QoL index                                                | ✓                             | ✓                               |
| <i>At baseline and study end</i>                              |                               |                                 |
| Q <sub>max</sub>                                              | ✓                             | ✓                               |
| PVR                                                           | ✓                             | ✓                               |
| PV                                                            | ✓                             | ✓                               |
| <b><i>Safety assessment</i></b>                               |                               |                                 |
| <i>At each visit</i>                                          |                               |                                 |
| Recording and assessing adverse events                        | ✓                             | ✓                               |
| Blood pressure, heart rate                                    | ✓                             | ✓                               |
| <i>At baseline and study end</i>                              |                               |                                 |
| Hemogram                                                      | ✓                             | ✓                               |
| Kidney and liver function laboratory tests                    | ✓                             | ✓                               |
| Serum PSA value                                               | ✓                             | ✓                               |
| Urine stick test                                              | ✓                             | ✓                               |
| Physical examination                                          | ✓                             | ✓                               |

\*In the GRANU study, the responsible ethics committee demanded the exclusion of patients with severe symptoms (IPSS > 19) and upper limits for PV and PVR.

<sup>1</sup> Bach, D., 2000. Placebokontrollierte Langzeittherapiestudie mit Kürbissamenextrakt bei BPH-bedingten Miktionsbeschwerden. *Der Urologe B* 40, 437-443.

<sup>2</sup> Vahlensieck, W., Theurer, C., Pfitzer, E., Patz, B., Banik, N., Engelmann, U., 2015. Effects of Pumpkin Seed in Men with Lower Urinary Tract Symptoms due to Benign Prostatic Hyperplasia in the One-Year, Randomized, Placebo-Controlled GRANU Study. *Urologia Internationalis* 94, 286-295.

## Supplementary Table B

Baseline demographic and disease characteristics of the PP set

| Variable study                | n   | PSE<br>(N=485)<br>mean (SD) | Placebo<br>(N=488)<br>mean (SD) | Total<br>(N=973)<br>mean (SD) | P value |
|-------------------------------|-----|-----------------------------|---------------------------------|-------------------------------|---------|
| <i>Age (years)</i>            |     |                             |                                 |                               |         |
| Bach study                    | 356 | 62.8 (7.4)                  | 62.8 (7.0)                      | 62.8 (7.1)                    | 0.96    |
| GRANU study                   | 617 | 65.2 (6.8)                  | 65.5 (6.7)                      | 65.4 (6.7)                    | 0.64    |
| Pooled                        | 973 | 64.4 (7.1)                  | 64.5 (6.9)                      | 64.4 (7.0)                    | 0.73    |
| <i>Height (cm)</i>            |     |                             |                                 |                               |         |
| Bach study                    | 356 | 174.4 (6.1)                 | 174.1 (6.5)                     | 174.3 (6.3)                   | 0.60    |
| GRANU study                   | 616 | 175.5 (6.6)                 | 175.9 (6.5)                     | 175.7 (6.5)                   | 0.45    |
| Pooled                        | 972 | 175.1 (6.4)                 | 175.3 (6.6)                     | 175.2 (6.5)                   | 0.76    |
| <i>Weight (kg)</i>            |     |                             |                                 |                               |         |
| Bach study                    | 356 | 80.7 (11.1)                 | 80.0 ( 8.9)                     | 80.3 (10.1)                   | 0.52    |
| GRANU study                   | 616 | 84.9 (12.1)                 | 83.8 (12.6)                     | 84.4 (12.3)                   | 0.27    |
| Pooled                        | 972 | 83.4 (11.9)                 | 82.4 (11.5)                     | 82.9 (11.7)                   | 0.21    |
| <i>IPSS</i>                   |     |                             |                                 |                               |         |
| Bach study                    | 356 | 17.8 (3.6)                  | 17.9 (3.8)                      | 17.8 (3.7)                    | 0.80    |
| GRANU study                   | 617 | 16.0 (1.8)                  | 16.1 (1.8)                      | 16.1 (1.8)                    | 0.49    |
| Pooled                        | 973 | 16.7 (2.8)                  | 16.8 (2.8)                      | 16.7 (2.8)                    | 0.59    |
| <i>IPSS QoL index</i>         |     |                             |                                 |                               |         |
| Bach study                    | 355 | 3.3 (0.9)                   | 3.2 (0.9)                       | 3.2 (0.9)                     | 0.92    |
| GRANU study                   | 609 | 3.5 (0.7)                   | 3.5 (0.7)                       | 3.5 (0.7)                     | 0.45    |
| Pooled                        | 964 | 3.4 (0.8)                   | 3.4 (0.8)                       | 3.4 (0.8)                     | 0.57    |
| <i>Prostate volume (mL)</i>   |     |                             |                                 |                               |         |
| Bach study <sup>§</sup>       | 237 | 34.8 (16.4)                 | 36.0 (19.6)                     | 35.4 (18.0)                   | 0.61    |
| GRANU study                   | 617 | 28.0 ( 8.5)                 | 28.8 ( 7.4)                     | 28.4 ( 8.0)                   | 0.22    |
| Pooled                        | 854 | 29.9 (11.6)                 | 30.8 (12.5)                     | 30.3 (12.1)                   | 0.28    |
| <i>Q<sub>max</sub> (mL/s)</i> |     |                             |                                 |                               |         |
| Bach study                    | 356 | 10.7 (2.5)                  | 10.9 (2.6)                      | 10.8 (2.6)                    | 0.39    |
| GRANU study                   | 617 | 9.5 (2.0)                   | 9.6 (1.9)                       | 9.5 (1.9)                     | 0.54    |
| Pooled                        | 973 | 9.9 (2.3)                   | 10.1 (2.3)                      | 10.0 (2.3)                    | 0.32    |
| <i>PVR (mL)</i>               |     |                             |                                 |                               |         |
| Bach study                    | 356 | 48.2 (43.4)                 | 48.9 (44.5)                     | 48.6 (43.9)                   | 0.88    |
| GRANU study                   | 617 | 33.8 (28.5)                 | 34.9 (27.5)                     | 34.4 (28.0)                   | 0.61    |
| Pooled                        | 973 | 39.1 (35.4)                 | 40.0 (35.3)                     | 39.6 (35.3)                   | 0.67    |

<sup>§</sup> Prostate size measurement in the Bach study was optional. PSE, pumpkin seed soft extract.

P values were calculated using a *t* test assuming equal variances.

### Supplementary Table C

Mean IPSS change from baseline at all visits and differences between treatment groups after 12 months (PSE minus placebo), ITT set using LOCF

| Study (N)<br><i>Treatment period</i> | PSE |            | Placebo |            | Difference<br>PSE vs. placebo |                   |
|--------------------------------------|-----|------------|---------|------------|-------------------------------|-------------------|
|                                      | n   | Mean (SE)  | n       | Mean (SE)  | Mean [95%CI]                  | <i>P</i><br>value |
| <b>Bach study (465)</b>              |     |            |         |            |                               |                   |
| 3 months                             | 212 | -4.8 (0.3) | 220     | -4.2 (0.3) |                               |                   |
| 6 months                             | 206 | -5.6 (0.3) | 215     | -5.5 (0.3) |                               |                   |
| 9 months                             | 201 | -6.3 (0.3) | 207     | -5.6 (0.4) |                               |                   |
| 12 months                            | 209 | -6.8 (0.3) | 217     | -5.6 (0.4) |                               |                   |
| 12 months (ITT-LOCF)                 | 227 |            | 238     |            | -1.1 [-2.0, -0.1]             | 0.02              |
| <b>GRANU study (924)</b>             |     |            |         |            |                               |                   |
| 3 months                             | 454 | -3.1 (0.2) | 460     | -2.9 (0.2) |                               |                   |
| 6 months                             | 441 | -4.0 (0.2) | 439     | -3.9 (0.2) |                               |                   |
| 9 months                             | 427 | -4.1 (0.2) | 424     | -4.2 (0.3) |                               |                   |
| 12 months                            | 404 | -4.6 (0.3) | 406     | -4.4 (0.3) |                               |                   |
| 12 months (ITT-LOCF)                 | 460 |            | 464     |            | -0.3 [-1.0, 0.4]              | 0.37              |
| <b>Pooled (1389)</b>                 |     |            |         |            |                               |                   |
| 3 months                             | 666 | -3.7 (0.2) | 689     | -3.3 (0.2) |                               |                   |
| 6 months                             | 647 | -4.5 (0.2) | 654     | -4.4 (0.2) |                               |                   |
| 9 months                             | 628 | -4.8 (0.2) | 631     | -4.6 (0.2) |                               |                   |
| 12 months                            | 613 | -5.3 (0.2) | 623     | -4.8 (0.2) |                               |                   |
| 12 months (ITT-LOCF)                 | 687 |            | 702     |            | -0.6 [-1.1, 0.0]              | 0.05              |

CI, Confidence intervals calculated using *t*-distribution: *P* values were calculated using a *t* test assuming equal variances. PSE, pumpkin seed soft extract.

## Supplementary Table D

IPSS QoL scores and changes from baseline at all visits (ITT set).

| Study (N)<br>Visit       | IPSS QoL Score |                         |          |                         | Change from baseline |                            |          |                            |
|--------------------------|----------------|-------------------------|----------|-------------------------|----------------------|----------------------------|----------|----------------------------|
|                          | PSE            |                         | Placebo  |                         | PSE                  |                            | Placebo  |                            |
|                          | <i>n</i>       | Mean (SD)<br>[95% CI]   | <i>n</i> | Mean (SD)<br>[95% CI]   | <i>n</i>             | Mean (SD)<br>[95% CI]      | <i>n</i> | Mean (SD)<br>[95% CI]      |
| <b>Bach study (465)</b>  |                |                         |          |                         |                      |                            |          |                            |
| Baseline                 | 227            | 3.2 (0.9)<br>[3.1, 3.3] | 237      | 3.2 (0.9)<br>[3.1, 3.3] |                      |                            |          |                            |
| 3 months                 | 212            | 2.1 (0.9)<br>[2.0, 2.2] | 220      | 2.3 [1.0]<br>[2.2, 2.5] | 212                  | -1.1 (1.0)<br>[-1.2, -0.9] | 219      | -0.9 (1.1)<br>[-1.0, -0.7] |
| 6 months                 | 206            | 2.0 (0.9)<br>[1.9, 2.1] | 215      | 2.1 (1.0)<br>[2.0, 2.2] | 206                  | -1.2 (1.1)<br>[-1.4, -1.1] | 214      | -1.1 (1.1)<br>[-1.3, -1.0] |
| 9 months                 | 201            | 1.9 (1.0)<br>[1.8, 2.1] | 207      | 2.0 (1.0)<br>[1.9, 2.2] | 201                  | -1.3 (1.1)<br>[-1.4, -1.1] | 206      | -1.2 (1.2)<br>[-1.3, -1.0] |
| 12 months                | 209            | 1.9 (1.0)<br>[1.8, 2.0] | 217      | 2.1 (1.1)<br>[1.9, 2.2] | 209                  | -1.3 (1.2)<br>[-1.5, -1.1] | 216      | -1.1 (1.2)<br>[-1.3, -1.0] |
| <b>GRANU study (924)</b> |                |                         |          |                         |                      |                            |          |                            |
| Baseline                 | 452            | 3.5 [0.7]<br>[3.4, 3.6] | 461      | 3.5 (0.7)<br>[3.4, 3.6] |                      |                            |          |                            |
| 3 months                 | 459            | 2.7 (1.1)<br>[2.6, 2.8] | 464      | 2.8 (1.1)<br>[2.7, 2.9] | 451                  | -0.8 (1.1)<br>[-0.9, -0.7] | 461      | -0.7 (1.1)<br>[-0.8, -0.6] |
| 6 months                 | 439            | 2.5 (1.1)<br>[2.4, 2.6] | 440      | 2.6 (1.1)<br>[2.5, 2.7] | 432                  | -1.0 (1.1)<br>[-1.1, -0.9] | 437      | -0.9 (1.1)<br>[-1.1, -0.8] |
| 9 months                 | 430            | 2.3 (1.1)<br>[2.2, 2.5] | 421      | 2.5 (1.2)<br>[2.4, 2.6] | 422                  | -1.1 (1.2)<br>[-1.3, -1.0] | 418      | -1.0 (1.2)<br>[-1.1, -0.9] |
| 12 months                | 403            | 2.3 (1.1)<br>[2.2, 2.4] | 407      | 2.5 (1.2)<br>[2.3, 2.6] | 397                  | -1.2 (1.2)<br>[-1.3, -1.1] | 404      | -1.0 (1.2)<br>[-1.2, -0.9] |
| <b>Pooled (1389)</b>     |                |                         |          |                         |                      |                            |          |                            |
| Baseline                 | 679            | 3.4 (0.8)<br>[3.3, 3.5] | 698      | 3.4 (0.8)<br>[3.4, 3.5] |                      |                            |          |                            |
| 3 months                 | 671            | 2.5 (1.1)<br>[2.5, 2.6] | 684      | 2.6 (1.1)<br>[2.6, 2.7] | 663                  | -0.9 (1.1)<br>[-0.9, -0.8] | 680      | -0.8 (1.1)<br>[-0.9, -0.7] |
| 6 months                 | 645            | 2.3 (1.1)<br>[2.2, 2.4] | 655      | 2.4 (1.1)<br>[2.3, 2.5] | 638                  | -1.1 (1.1)<br>[-1.2, -1.0] | 651      | -1.0 (1.1)<br>[-1.1, -0.9] |
| 9 months                 | 631            | 2.2 (1.1)<br>[2.1, 2.3] | 628      | 2.3 (1.1)<br>[2.2, 2.4] | 623                  | -1.2 (1.2)<br>[-1.3, -1.1] | 624      | -1.1 (1.2)<br>[-1.2, -1.0] |
| 12 months*               | 612            | 2.2 (1.1)<br>[2.1, 2.2] | 624      | 2.3 (1.2)<br>[2.2, 2.4] | 606                  | -1.2 (1.2)<br>[-1.3, -1.1] | 620      | -1.1 (1.2)<br>[-1.2, -1.0] |

Confidence intervals (CI) were calculated using *t*-distribution. \**P* = 0.02 for the difference between PSE and placebo group after 12-month treatment, calculated using a *t* test assuming equal variances. PSE, pumpkin seed soft extract.
